# Supplementary material
Source: PubMed Central journal article supplement (PMC2795706)

**A**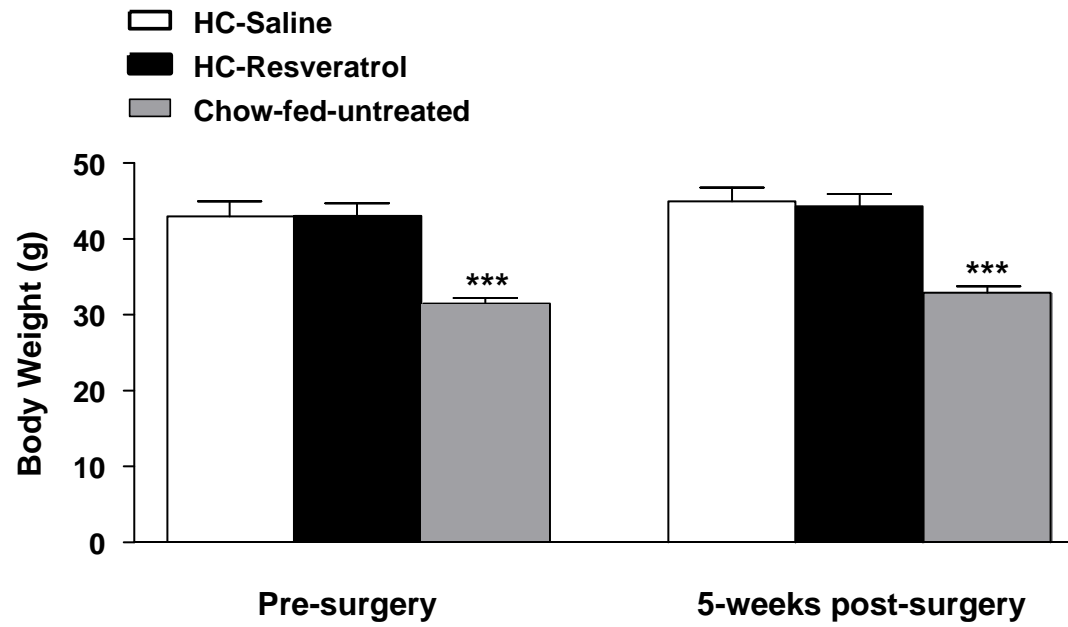**B**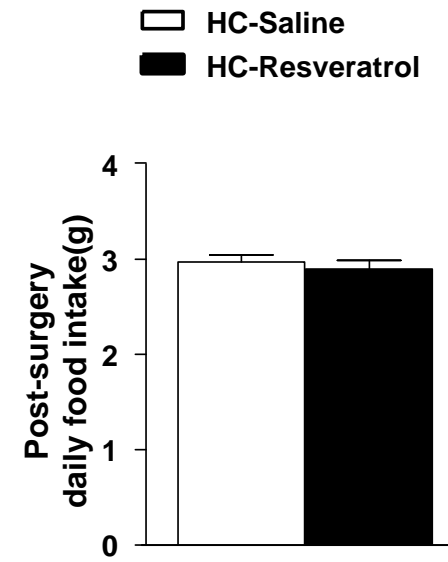

Supplement: en.2009-0528_1.pdf [file en.2009-0528_1.pdf]

**A**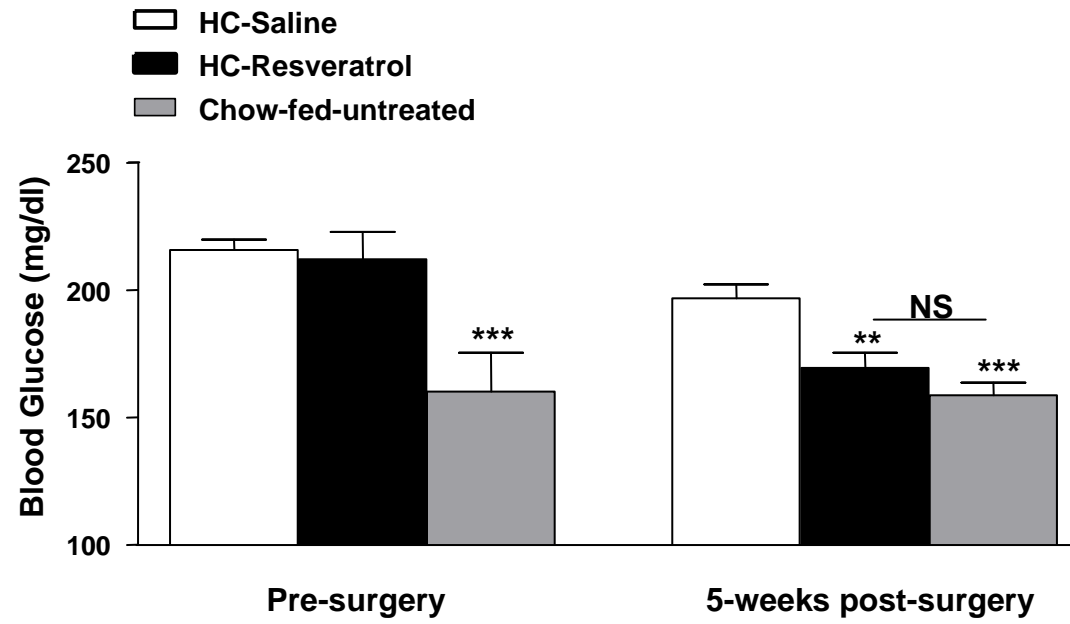**B**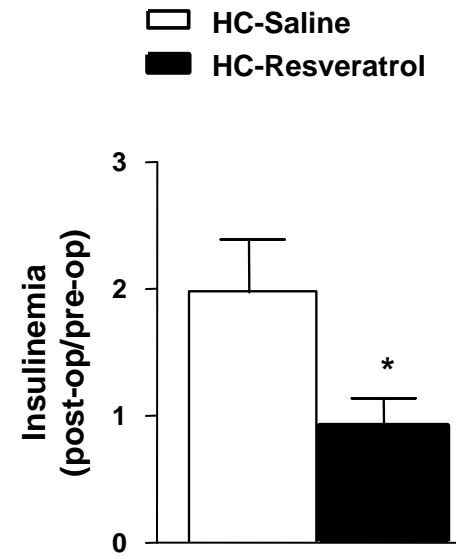

Supplement: en.2009-0528_2.pdf [file en.2009-0528_2.pdf]

□ HC-Saline  
■ HC-Resveratrol

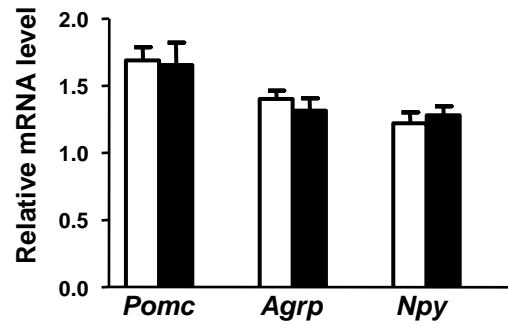

Supplement: en.2009-0528_3.pdf [file en.2009-0528_3.pdf]
